# Supplementary material for: Synthesis and characterization of trans-M2(TiPB)2(O2C-CHCH-2-C4H3S)2 (M = Mo or W) and comments on the metal-to-ligand charge transfer bands in MM quadruply bonded complexes of the type trans-M2(TiPB)2L2, where TiPB = 2,4,6-triisopropylbenzoate and L = π-accepting carboxylate ligand
Source: Royal Society of Chemistry journal article supplement (doi:10.1039/c1dt10788g), 2011-01-01
Supplement: c1dt10788g.pdf [file c1dt10788g.pdf]

## Electronic supplementary information:

### Synthesis and Characterization of *trans*-M<sub>2</sub>(T<sup>i</sup>PB)<sub>2</sub>(O<sub>2</sub>C-CH=CH-2-C<sub>4</sub>H<sub>3</sub>S)<sub>2</sub> (M = Mo or W) and Comments on the Metal-to-Ligand Charge Transfer Bands in MM Quadruply Bonded Complexes of the Type *trans*-M<sub>2</sub>(T<sup>i</sup>PB)<sub>2</sub>L<sub>2</sub>, where T<sup>i</sup>PB = 2,4,6-triisopropylbenzoate and L = $\pi$ -Accepting Carboxylate Ligand.

Brian G. Alberding, Malcolm H. Chisholm\*, Benjamin J. Lear, Vesal Naseri and Carly R. Reed

Department of Chemistry, The Ohio State University, 100 W. 18th Ave, Columbus, OH 43210

**Table 1. Crystal data and structure refinement for Mo<sub>2</sub>(TiPB)<sub>2</sub>(O<sub>2</sub>C-CH=CH-C<sub>4</sub>H<sub>3</sub>S)<sub>2</sub>·2DMSO·2THF.**

|                                 |                                                                                                                       |                         |
|---------------------------------|-----------------------------------------------------------------------------------------------------------------------|-------------------------|
| Identification code             | Mo <sub>2</sub> (TiPB) <sub>2</sub> (O <sub>2</sub> C-CH=CH-C <sub>4</sub> H <sub>3</sub> S) <sub>2</sub> ·2DMSO·2THF |                         |
| Empirical formula               | C <sub>116</sub> H <sub>168</sub> Mo <sub>4</sub> O <sub>24</sub> S <sub>8</sub>                                      |                         |
| Formula weight                  | 2586.74                                                                                                               |                         |
| Temperature                     | 180(2) K                                                                                                              |                         |
| Wavelength                      | 0.71073 Å                                                                                                             |                         |
| Crystal system, space group     | Triclinic, P-1                                                                                                        |                         |
| Unit cell dimensions            | a = 13.9371(1) Å                                                                                                      | alpha = 72.1801(3) deg. |
|                                 | b = 15.6806(1) Å                                                                                                      | beta = 83.7171(3) deg.  |
|                                 | c = 16.2650(1) Å                                                                                                      | gamma = 70.2194(3) deg. |
| Volume                          | 3184.31(4) Å <sup>3</sup>                                                                                             |                         |
| Z, Calculated density           | 1, 1.349 Mg/m <sup>3</sup>                                                                                            |                         |
| Absorption coefficient          | 0.580 mm <sup>-1</sup>                                                                                                |                         |
| F(000)                          | 1352                                                                                                                  |                         |
| Crystal size                    | 0.11 x 0.09 x 0.08 mm                                                                                                 |                         |
| Theta range for data collection | 2.57 to 24.71 deg.                                                                                                    |                         |
| Limiting indices                | -16<=h<=16, -18<=k<=18, -19<=l<=19                                                                                    |                         |
| Reflections collected / unique  | 21362 / 10837 [R(int) = 0.0146]                                                                                       |                         |
| Completeness to theta = 24.71   | 99.9 %                                                                                                                |                         |
| Absorption correction           | Semi-empirical from equivalents                                                                                       |                         |
| Max. and min. transmission      | 0.955 and 0.939                                                                                                       |                         |
| Refinement method               | Full-matrix least-squares on F <sup>2</sup>                                                                           |                         |
| Data / restraints / parameters  | 10848 / 476 / 773                                                                                                     |                         |

Goodness-of-fit on  $F^2$  1.035  
Final R indices [ $I > 2\sigma(I)$ ]  $R_1 = 0.0479$ ,  $wR_2 = 0.1203$   
R indices (all data)  $R_1 = 0.0568$ ,  $wR_2 = 0.1262$   
Largest diff. peak and hole 1.384 and  $-1.193 \text{ e.}\text{\AA}^{-3}$

Table 2. Atomic coordinates ( $\times 10^4$ ) and equivalent isotropic displacement parameters ( $\text{\AA}^2 \times 10^3$ ) for carly2.  $U(\text{eq})$  is defined as one third of the trace of the orthogonalized  $U_{ij}$  tensor.

|        | x        | y        | z       | $U(\text{eq})$ |
|--------|----------|----------|---------|----------------|
| Mo(1)  | 5387(1)  | 9630(1)  | 591(1)  | 28(1)          |
| Mo(2)  | 213(1)   | 4712(1)  | 5650(1) | 34(1)          |
| S(1)   | 1096(1)  | 13053(1) | 2273(1) | 49(1)          |
| O(1)   | 4643(2)  | 8610(2)  | 871(2)  | 34(1)          |
| O(2)   | 3819(2)  | 9385(2)  | -379(2) | 33(1)          |
| O(3)   | 4231(2)  | 10445(2) | 1251(2) | 33(1)          |
| O(4)   | 3409(2)  | 11228(2) | 0(2)    | 33(1)          |
| O(5)   | 1037(2)  | 3384(2)  | 5447(2) | 39(1)          |
| O(6)   | 577(2)   | 3994(2)  | 4074(2) | 36(1)          |
| O(7)   | 1533(2)  | 5065(2)  | 5450(2) | 54(1)          |
| O(8)   | 1140(3)  | 5713(2)  | 4060(2) | 58(1)          |
| C(1)   | 3999(3)  | 8715(3)  | 319(2)  | 33(1)          |
| C(2)   | 3434(3)  | 8021(3)  | 503(2)  | 38(1)          |
| C(3)   | 3890(4)  | 7173(3)  | 308(3)  | 49(1)          |
| C(30)  | 4938(4)  | 6960(4)  | -109(4) | 70(2)          |
| C(31)  | 5745(5)  | 6268(6)  | 549(5)  | 103(2)         |
| C(32)  | 4986(6)  | 6624(5)  | -901(4) | 97(2)          |
| C(4)   | 3353(4)  | 6517(3)  | 511(3)  | 60(1)          |
| C(5)   | 2396(4)  | 6712(4)  | 873(4)  | 60(1)          |
| C(50)  | 1793(5)  | 6001(4)  | 1085(5) | 82(2)          |
| C(51)  | 2006(10) | 5413(7)  | 2025(5) | 165(5)         |
| C(52)  | 2054(5)  | 5365(5)  | 524(5)  | 89(2)          |
| C(6)   | 1965(4)  | 7568(4)  | 1051(4) | 61(1)          |
| C(7)   | 2463(3)  | 8235(3)  | 879(3)  | 47(1)          |
| C(70)  | 1984(4)  | 9171(4)  | 1081(4) | 68(2)          |
| C(71)  | 1403(5)  | 9954(5)  | 302(5)  | 96(2)          |
| C(72)  | 1337(6)  | 9116(6)  | 1887(5) | 111(3)         |
| C(8)   | 3484(3)  | 11091(3) | 811(2)  | 33(1)          |
| C(9)   | 2701(3)  | 11688(3) | 1257(3) | 37(1)          |
| C(10)  | 1899(3)  | 12376(3) | 859(3)  | 37(1)          |
| C(11)  | 1103(3)  | 13039(3) | 1218(2) | 36(1)          |
| C(12)  | 279(3)   | 13738(3) | 787(3)  | 46(1)          |
| C(13)  | -354(4)  | 14283(3) | 1319(3) | 53(1)          |
| C(14)  | 0(3)     | 13991(3) | 2131(3) | 52(1)          |
| C(15)  | 1032(3)  | 3307(3)  | 4695(2) | 31(1)          |
| C(16)  | 1566(3)  | 2355(3)  | 4559(2) | 36(1)          |
| C(17)  | 2525(3)  | 2167(3)  | 4154(3) | 43(1)          |
| C(170) | 2998(3)  | 2947(4)  | 3811(3) | 54(1)          |
| C(171) | 3784(4)  | 2788(5)  | 3090(4) | 83(2)          |
| C(172) | 3472(4)  | 3109(5)  | 4529(4) | 71(2)          |
| C(18)  | 2997(4)  | 1252(4)  | 4094(3) | 63(2)          |
| C(19)  | 2562(6)  | 547(4)   | 4397(4) | 78(2)          |
| C(190) | 3130(8)  | -443(5)  | 4316(6) | 134(4)         |
| C(191) | 3024(7)  | -550(5)  | 3505(5) | 115(3)         |

|        |           |           |          |         |
|--------|-----------|-----------|----------|---------|
| C(192) | 3731(8)   | -1056(5)  | 4987(6)  | 155(5)  |
| C(20)  | 1601(5)   | 772(4)    | 4765(4)  | 72(2)   |
| C(21)  | 1088(4)   | 1664(3)   | 4857(3)  | 51(1)   |
| C(210) | 27(5)     | 1895(4)   | 5246(4)  | 74(2)   |
| C(211) | -710(13)  | 2052(17)  | 4549(11) | 108(7)  |
| C(212) | -93(14)   | 1104(18)  | 6018(9)  | 117(8)  |
| C(213) | 27(5)     | 1895(4)   | 5246(4)  | 74(2)   |
| C(214) | -700(20)  | 1510(30)  | 5000(30) | 180(20) |
| C(215) | 44(18)    | 1691(15)  | 6250(15) | 118(10) |
| C(23)  | 1713(3)   | 5467(3)   | 4754(3)  | 47(1)   |
| C(24)  | 2674(4)   | 5750(4)   | 4568(4)  | 63(1)   |
| C(25)  | 2939(4)   | 6209(3)   | 3851(4)  | 62(1)   |
| S(2)   | 4760(2)   | 6272(3)   | 4361(3)  | 58(1)   |
| C(26)  | 3858(3)   | 6496(3)   | 3654(3)  | 48(1)   |
| C(27)  | 3918(7)   | 7040(7)   | 2732(6)  | 31(2)   |
| C(28)  | 5047(4)   | 7192(4)   | 2845(3)  | 56(1)   |
| C(29)  | 5452(4)   | 6816(4)   | 3629(3)  | 61(1)   |
| S(2')  | 4122(8)   | 7058(9)   | 2804(6)  | 58(1)   |
| C(26') | 3858(3)   | 6496(3)   | 3654(3)  | 48(1)   |
| C(27') | 4530(30)  | 6440(30)  | 4350(30) | 31(2)   |
| C(28') | 5047(4)   | 7192(4)   | 2845(3)  | 56(1)   |
| C(29') | 5452(4)   | 6816(4)   | 3629(3)  | 61(1)   |
| S(10)  | 1733(2)   | 3098(1)   | 7493(1)  | 93(1)   |
| O(10)  | 846(4)    | 3920(3)   | 7195(2)  | 101(2)  |
| C(101) | 2282(7)   | 3219(5)   | 8294(5)  | 115(3)  |
| C(102) | 1172(6)   | 2335(6)   | 8285(7)  | 143(4)  |
| S(11)  | 6833(2)   | 9453(2)   | 2430(1)  | 50(1)   |
| O(11)  | 6342(2)   | 8960(2)   | 2028(2)  | 45(1)   |
| C(111) | 5880(40)  | 10550(50) | 2470(40) | 64(3)   |
| C(113) | 6826(17)  | 8830(20)  | 3573(17) | 70(5)   |
| S(11') | 6031(2)   | 9275(2)   | 2855(2)  | 50(1)   |
| O(11') | 6342(2)   | 8960(2)   | 2028(2)  | 45(1)   |
| C(114) | 5820(50)  | 10500(50) | 2540(40) | 64(3)   |
| C(112) | 7221(19)  | 8980(20)  | 3403(19) | 70(5)   |
| O(14)  | -3640(20) | 4680(20)  | 3088(19) | 195(4)  |
| C(141) | -2780(30) | 4290(30)  | 2670(30) | 178(5)  |
| C(142) | -2930(30) | 3550(30)  | 2350(20) | 190(5)  |
| C(143) | -3780(30) | 3320(30)  | 2960(30) | 208(5)  |
| C(144) | -4350(20) | 4300(30)  | 3020(30) | 199(6)  |
| O(14') | -3049(10) | 3394(11)  | 3717(8)  | 195(4)  |
| C(145) | -2602(13) | 4041(16)  | 3197(10) | 178(5)  |
| C(146) | -3092(15) | 4500(16)  | 2331(11) | 190(5)  |
| C(147) | -4121(14) | 4336(16)  | 2535(13) | 208(5)  |
| C(148) | -3972(15) | 3622(19)  | 3384(12) | 199(6)  |
| O(13)  | 8710(30)  | 12060(30) | 1070(20) | 210(4)  |
| C(131) | 7640(30)  | 12150(30) | 1420(20) | 176(4)  |
| C(132) | 7740(30)  | 11500(30) | 2250(20) | 156(4)  |
| C(133) | 8680(30)  | 10980(20) | 2300(20) | 151(4)  |
| C(134) | 9240(30)  | 11640(40) | 1950(20) | 150(4)  |
| O(13') | 8900(12)  | 11772(12) | 1415(8)  | 210(4)  |
| C(135) | 8258(14)  | 11172(15) | 1506(8)  | 176(4)  |
| C(136) | 8039(13)  | 10943(13) | 2399(8)  | 156(4)  |
| C(137) | 8445(13)  | 11295(12) | 2799(8)  | 151(4)  |
| C(138) | 9245(13)  | 11604(15) | 2319(9)  | 150(4)  |

Table 3. Bond lengths [Å] and angles [deg] for carly2.

|               |            |
|---------------|------------|
| Mo(1)-O(1)    | 2.102(3)   |
| Mo(1)-O(3)    | 2.108(3)   |
| Mo(1)-Mo(1)#1 | 2.1093(10) |

|               |           |
|---------------|-----------|
| Mo(1)-O(4)#1  | 2.113(3)  |
| Mo(1)-O(2)#1  | 2.115(3)  |
| Mo(1)-O(11)   | 2.563(3)  |
| Mo(2)-O(7)    | 2.060(3)  |
| Mo(2)-Mo(2)#2 | 2.0937(9) |
| Mo(2)-O(6)#2  | 2.113(3)  |
| Mo(2)-O(5)    | 2.117(3)  |
| Mo(2)-O(8)#2  | 2.165(3)  |
| Mo(2)-O(10)   | 2.544(4)  |
| S(1)-C(14)    | 1.703(5)  |
| S(1)-C(11)    | 1.721(4)  |
| O(1)-C(1)     | 1.273(4)  |
| O(2)-C(1)     | 1.269(4)  |
| O(2)-Mo(1)#1  | 2.115(3)  |
| O(3)-C(8)     | 1.276(4)  |
| O(4)-C(8)     | 1.281(4)  |
| O(4)-Mo(1)#1  | 2.113(3)  |
| O(5)-C(15)    | 1.265(4)  |
| O(6)-C(15)    | 1.263(4)  |
| O(6)-Mo(2)#2  | 2.113(3)  |
| O(7)-C(23)    | 1.162(6)  |
| O(8)-C(23)    | 1.336(6)  |
| O(8)-Mo(2)#2  | 2.165(3)  |
| C(1)-C(2)     | 1.492(5)  |
| C(2)-C(3)     | 1.383(6)  |
| C(2)-C(7)     | 1.399(6)  |
| C(3)-C(4)     | 1.409(6)  |
| C(3)-C(30)    | 1.516(7)  |
| C(30)-C(32)   | 1.520(8)  |
| C(30)-C(31)   | 1.521(9)  |
| C(30)-H(30A)  | 1.0000    |
| C(31)-H(31A)  | 0.9800    |
| C(31)-H(31B)  | 0.9800    |
| C(31)-H(31C)  | 0.9800    |
| C(32)-H(32A)  | 0.9800    |
| C(32)-H(32B)  | 0.9800    |
| C(32)-H(32C)  | 0.9800    |
| C(4)-C(5)     | 1.371(7)  |
| C(4)-H(4A)    | 0.9500    |
| C(5)-C(6)     | 1.378(7)  |
| C(5)-C(50)    | 1.552(7)  |
| C(50)-C(52)   | 1.482(9)  |
| C(50)-C(51)   | 1.525(10) |
| C(50)-H(50A)  | 1.0000    |
| C(51)-H(51A)  | 0.9800    |
| C(51)-H(51B)  | 0.9800    |
| C(51)-H(51C)  | 0.9800    |
| C(52)-H(52A)  | 0.9800    |
| C(52)-H(52B)  | 0.9800    |
| C(52)-H(52C)  | 0.9800    |
| C(6)-C(7)     | 1.387(6)  |
| C(6)-H(6A)    | 0.9500    |
| C(7)-C(70)    | 1.513(7)  |
| C(70)-C(72)   | 1.505(8)  |
| C(70)-C(71)   | 1.540(9)  |
| C(70)-H(70A)  | 1.0000    |
| C(71)-H(71A)  | 0.9800    |
| C(71)-H(71B)  | 0.9800    |
| C(71)-H(71C)  | 0.9800    |
| C(72)-H(72A)  | 0.9800    |
| C(72)-H(72B)  | 0.9800    |
| C(72)-H(72C)  | 0.9800    |
| C(8)-C(9)     | 1.465(5)  |

|               |           |
|---------------|-----------|
| C(9)-C(10)    | 1.323(5)  |
| C(9)-H(9A)    | 0.9500    |
| C(10)-C(11)   | 1.449(5)  |
| C(10)-H(10A)  | 0.9500    |
| C(11)-C(12)   | 1.366(6)  |
| C(12)-C(13)   | 1.425(6)  |
| C(12)-H(12A)  | 0.9500    |
| C(13)-C(14)   | 1.348(7)  |
| C(13)-H(13A)  | 0.9500    |
| C(14)-H(14A)  | 0.9500    |
| C(15)-C(16)   | 1.499(5)  |
| C(16)-C(21)   | 1.396(6)  |
| C(16)-C(17)   | 1.402(6)  |
| C(17)-C(18)   | 1.391(6)  |
| C(17)-C(170)  | 1.514(7)  |
| C(170)-C(172) | 1.525(7)  |
| C(170)-C(171) | 1.534(7)  |
| C(170)-H(17A) | 1.0000    |
| C(171)-H(17E) | 0.9800    |
| C(171)-H(17F) | 0.9800    |
| C(171)-H(17G) | 0.9800    |
| C(172)-H(17B) | 0.9800    |
| C(172)-H(17C) | 0.9800    |
| C(172)-H(17D) | 0.9800    |
| C(18)-C(19)   | 1.375(9)  |
| C(18)-H(18A)  | 0.9500    |
| C(19)-C(20)   | 1.381(9)  |
| C(19)-C(190)  | 1.525(7)  |
| C(190)-C(192) | 1.353(10) |
| C(190)-C(191) | 1.408(10) |
| C(190)-H(19G) | 1.0000    |
| C(191)-H(19A) | 0.9800    |
| C(191)-H(19B) | 0.9800    |
| C(191)-H(19C) | 0.9800    |
| C(192)-H(19D) | 0.9800    |
| C(192)-H(19E) | 0.9800    |
| C(192)-H(19F) | 0.9800    |
| C(20)-C(21)   | 1.385(7)  |
| C(20)-H(20A)  | 0.9500    |
| C(21)-C(210)  | 1.513(8)  |
| C(210)-C(212) | 1.512(18) |
| C(210)-C(211) | 1.521(19) |
| C(210)-H(21A) | 1.0000    |
| C(211)-H(21B) | 0.9800    |
| C(211)-H(21C) | 0.9800    |
| C(211)-H(21D) | 0.9800    |
| C(212)-H(21E) | 0.9800    |
| C(212)-H(21F) | 0.9800    |
| C(212)-H(21G) | 0.9800    |
| C(214)-H(21I) | 0.9800    |
| C(214)-H(21J) | 0.9800    |
| C(214)-H(21K) | 0.9800    |
| C(215)-H(21L) | 0.9800    |
| C(215)-H(21M) | 0.9800    |
| C(215)-H(21N) | 0.9800    |
| C(23)-C(24)   | 1.522(7)  |
| C(24)-C(25)   | 1.259(7)  |
| C(24)-H(24A)  | 0.9500    |
| C(25)-C(26)   | 1.468(7)  |
| C(25)-H(25A)  | 0.9500    |
| S(2)-C(29)    | 1.661(6)  |
| S(2)-C(26)    | 1.674(6)  |
| C(26)-C(27)   | 1.491(11) |

|               |           |
|---------------|-----------|
| C(27)-C(28)   | 1.706(9)  |
| C(27)-H(27A)  | 0.9500    |
| C(28)-C(29)   | 1.329(7)  |
| C(28)-H(28A)  | 0.9500    |
| C(29)-H(29A)  | 0.9500    |
| C(27')-H(27C) | 0.9500    |
| S(10)-O(10)   | 1.447(4)  |
| S(10)-C(101)  | 1.669(7)  |
| S(10)-C(102)  | 1.781(8)  |
| C(101)-H(10C) | 0.9800    |
| C(101)-H(10D) | 0.9800    |
| C(101)-H(10E) | 0.9800    |
| C(102)-H(10F) | 0.9800    |
| C(102)-H(10G) | 0.9800    |
| C(102)-H(10H) | 0.9800    |
| S(11)-O(11)   | 1.501(4)  |
| S(11)-C(111)  | 1.80(7)   |
| S(11)-C(113)  | 1.82(2)   |
| C(111)-H(11A) | 0.9800    |
| C(111)-H(11B) | 0.9800    |
| C(111)-H(11C) | 0.9800    |
| C(113)-H(11D) | 0.9800    |
| C(113)-H(11E) | 0.9800    |
| C(113)-H(11F) | 0.9800    |
| S(11')-C(114) | 1.75(7)   |
| S(11')-C(112) | 1.82(3)   |
| C(114)-H(11G) | 0.9800    |
| C(114)-H(11H) | 0.9800    |
| C(114)-H(11I) | 0.9800    |
| C(112)-H(11J) | 0.9800    |
| C(112)-H(11K) | 0.9800    |
| C(112)-H(11L) | 0.9800    |
| O(14)-C(144)  | 1.35(2)   |
| O(14)-C(141)  | 1.36(2)   |
| C(141)-C(142) | 1.50(2)   |
| C(141)-H(14B) | 0.9900    |
| C(141)-H(14C) | 0.9900    |
| C(142)-C(143) | 1.51(3)   |
| C(142)-H(14D) | 0.9900    |
| C(142)-H(14E) | 0.9900    |
| C(143)-C(144) | 1.50(2)   |
| C(143)-H(14F) | 0.9900    |
| C(143)-H(14G) | 0.9900    |
| C(144)-H(14H) | 0.9900    |
| C(144)-H(14I) | 0.9900    |
| O(14')-C(148) | 1.341(16) |
| O(14')-C(145) | 1.385(15) |
| C(145)-C(146) | 1.492(18) |
| C(145)-H(14J) | 0.9900    |
| C(145)-H(14K) | 0.9900    |
| C(146)-C(147) | 1.52(2)   |
| C(146)-H(14L) | 0.9900    |
| C(146)-H(14M) | 0.9900    |
| C(147)-C(148) | 1.469(18) |
| C(147)-H(14N) | 0.9900    |
| C(147)-H(14O) | 0.9900    |
| C(148)-H(14P) | 0.9900    |
| C(148)-H(14Q) | 0.9900    |
| O(13)-C(131)  | 1.508(18) |
| O(13)-C(134)  | 1.540(18) |
| C(131)-C(132) | 1.407(17) |
| C(131)-H(13B) | 0.9900    |
| C(131)-H(13C) | 0.9900    |

|                      |            |
|----------------------|------------|
| C(132)-C(133)        | 1.29(2)    |
| C(132)-H(13D)        | 0.9900     |
| C(132)-H(13E)        | 0.9900     |
| C(133)-C(134)        | 1.446(18)  |
| C(133)-H(13F)        | 0.9900     |
| C(133)-H(13G)        | 0.9900     |
| C(134)-H(13H)        | 0.9900     |
| C(134)-H(13I)        | 0.9900     |
| O(13')-C(135)        | 1.470(14)  |
| O(13')-C(138)        | 1.516(12)  |
| C(135)-C(136)        | 1.410(14)  |
| C(135)-H(13J)        | 0.9900     |
| C(135)-H(13K)        | 0.9900     |
| C(136)-C(137)        | 1.248(17)  |
| C(136)-H(13L)        | 0.9900     |
| C(136)-H(13M)        | 0.9900     |
| C(137)-C(138)        | 1.425(13)  |
| C(137)-H(13N)        | 0.9900     |
| C(137)-H(13O)        | 0.9900     |
| C(138)-H(13P)        | 0.9900     |
| C(138)-H(13Q)        | 0.9900     |
| O(1)-Mo(1)-O(3)      | 90.16(10)  |
| O(1)-Mo(1)-Mo(1)#1   | 92.17(7)   |
| O(3)-Mo(1)-Mo(1)#1   | 91.36(7)   |
| O(1)-Mo(1)-O(4)#1    | 89.80(10)  |
| O(3)-Mo(1)-O(4)#1    | 176.60(9)  |
| Mo(1)#1-Mo(1)-O(4)#1 | 92.04(7)   |
| O(1)-Mo(1)-O(2)#1    | 176.65(9)  |
| O(3)-Mo(1)-O(2)#1    | 89.77(10)  |
| Mo(1)#1-Mo(1)-O(2)#1 | 91.17(7)   |
| O(4)#1-Mo(1)-O(2)#1  | 90.08(10)  |
| O(1)-Mo(1)-O(11)     | 95.11(10)  |
| O(3)-Mo(1)-O(11)     | 84.88(10)  |
| Mo(1)#1-Mo(1)-O(11)  | 171.81(7)  |
| O(4)#1-Mo(1)-O(11)   | 91.74(10)  |
| O(2)#1-Mo(1)-O(11)   | 81.55(10)  |
| O(7)-Mo(2)-Mo(2)#2   | 94.06(11)  |
| O(7)-Mo(2)-O(6)#2    | 89.85(12)  |
| Mo(2)#2-Mo(2)-O(6)#2 | 92.21(8)   |
| O(7)-Mo(2)-O(5)      | 89.58(12)  |
| Mo(2)#2-Mo(2)-O(5)   | 91.05(8)   |
| O(6)#2-Mo(2)-O(5)    | 176.72(9)  |
| O(7)-Mo(2)-O(8)#2    | 176.41(13) |
| Mo(2)#2-Mo(2)-O(8)#2 | 89.45(10)  |
| O(6)#2-Mo(2)-O(8)#2  | 90.77(11)  |
| O(5)-Mo(2)-O(8)#2    | 89.61(11)  |
| O(7)-Mo(2)-O(10)     | 84.14(17)  |
| Mo(2)#2-Mo(2)-O(10)  | 175.62(9)  |
| O(6)#2-Mo(2)-O(10)   | 91.78(12)  |
| O(5)-Mo(2)-O(10)     | 84.95(12)  |
| O(8)#2-Mo(2)-O(10)   | 92.30(16)  |
| C(14)-S(1)-C(11)     | 92.3(2)    |
| C(1)-O(1)-Mo(1)      | 116.7(2)   |
| C(1)-O(2)-Mo(1)#1    | 117.1(2)   |
| C(8)-O(3)-Mo(1)      | 117.9(2)   |
| C(8)-O(4)-Mo(1)#1    | 116.8(2)   |
| C(15)-O(5)-Mo(2)     | 117.7(2)   |
| C(15)-O(6)-Mo(2)#2   | 116.8(2)   |
| C(23)-O(7)-Mo(2)     | 118.1(3)   |
| C(23)-O(8)-Mo(2)#2   | 112.9(3)   |
| O(2)-C(1)-O(1)       | 122.8(3)   |
| O(2)-C(1)-C(2)       | 118.7(3)   |

|                     |          |
|---------------------|----------|
| O(1)-C(1)-C(2)      | 118.5(3) |
| C(3)-C(2)-C(7)      | 121.5(4) |
| C(3)-C(2)-C(1)      | 119.2(4) |
| C(7)-C(2)-C(1)      | 119.3(4) |
| C(2)-C(3)-C(4)      | 118.1(4) |
| C(2)-C(3)-C(30)     | 120.7(4) |
| C(4)-C(3)-C(30)     | 121.2(4) |
| C(3)-C(30)-C(32)    | 113.3(5) |
| C(3)-C(30)-C(31)    | 110.8(5) |
| C(32)-C(30)-C(31)   | 111.6(5) |
| C(3)-C(30)-H(30A)   | 106.9    |
| C(32)-C(30)-H(30A)  | 106.9    |
| C(31)-C(30)-H(30A)  | 106.9    |
| C(30)-C(31)-H(31A)  | 109.5    |
| C(30)-C(31)-H(31B)  | 109.5    |
| H(31A)-C(31)-H(31B) | 109.5    |
| C(30)-C(31)-H(31C)  | 109.5    |
| H(31A)-C(31)-H(31C) | 109.5    |
| H(31B)-C(31)-H(31C) | 109.5    |
| C(30)-C(32)-H(32A)  | 109.5    |
| C(30)-C(32)-H(32B)  | 109.5    |
| H(32A)-C(32)-H(32B) | 109.5    |
| C(30)-C(32)-H(32C)  | 109.5    |
| H(32A)-C(32)-H(32C) | 109.5    |
| H(32B)-C(32)-H(32C) | 109.5    |
| C(5)-C(4)-C(3)      | 121.6(5) |
| C(5)-C(4)-H(4A)     | 119.2    |
| C(3)-C(4)-H(4A)     | 119.2    |
| C(4)-C(5)-C(6)      | 118.6(4) |
| C(4)-C(5)-C(50)     | 122.0(5) |
| C(6)-C(5)-C(50)     | 119.5(5) |
| C(52)-C(50)-C(51)   | 109.6(6) |
| C(52)-C(50)-C(5)    | 114.2(5) |
| C(51)-C(50)-C(5)    | 107.4(5) |
| C(52)-C(50)-H(50A)  | 108.5    |
| C(51)-C(50)-H(50A)  | 108.5    |
| C(5)-C(50)-H(50A)   | 108.5    |
| C(50)-C(51)-H(51A)  | 109.5    |
| C(50)-C(51)-H(51B)  | 109.5    |
| H(51A)-C(51)-H(51B) | 109.5    |
| C(50)-C(51)-H(51C)  | 109.5    |
| H(51A)-C(51)-H(51C) | 109.5    |
| H(51B)-C(51)-H(51C) | 109.5    |
| C(50)-C(52)-H(52A)  | 109.5    |
| C(50)-C(52)-H(52B)  | 109.5    |
| H(52A)-C(52)-H(52B) | 109.5    |
| C(50)-C(52)-H(52C)  | 109.5    |
| H(52A)-C(52)-H(52C) | 109.5    |
| H(52B)-C(52)-H(52C) | 109.5    |
| C(5)-C(6)-C(7)      | 122.5(5) |
| C(5)-C(6)-H(6A)     | 118.8    |
| C(7)-C(6)-H(6A)     | 118.8    |
| C(6)-C(7)-C(2)      | 117.7(4) |
| C(6)-C(7)-C(70)     | 122.1(4) |
| C(2)-C(7)-C(70)     | 120.2(4) |
| C(72)-C(70)-C(7)    | 114.1(5) |
| C(72)-C(70)-C(71)   | 111.6(5) |
| C(7)-C(70)-C(71)    | 111.7(5) |
| C(72)-C(70)-H(70A)  | 106.3    |
| C(7)-C(70)-H(70A)   | 106.3    |
| C(71)-C(70)-H(70A)  | 106.3    |
| C(70)-C(71)-H(71A)  | 109.5    |
| C(70)-C(71)-H(71B)  | 109.5    |

|                      |          |
|----------------------|----------|
| H(71A)-C(71)-H(71B)  | 109.5    |
| C(70)-C(71)-H(71C)   | 109.5    |
| H(71A)-C(71)-H(71C)  | 109.5    |
| H(71B)-C(71)-H(71C)  | 109.5    |
| C(70)-C(72)-H(72A)   | 109.5    |
| C(70)-C(72)-H(72B)   | 109.5    |
| H(72A)-C(72)-H(72B)  | 109.5    |
| C(70)-C(72)-H(72C)   | 109.5    |
| H(72A)-C(72)-H(72C)  | 109.5    |
| H(72B)-C(72)-H(72C)  | 109.5    |
| O(3)-C(8)-O(4)       | 121.9(3) |
| O(3)-C(8)-C(9)       | 118.2(3) |
| O(4)-C(8)-C(9)       | 119.9(3) |
| C(10)-C(9)-C(8)      | 122.8(4) |
| C(10)-C(9)-H(9A)     | 118.6    |
| C(8)-C(9)-H(9A)      | 118.6    |
| C(9)-C(10)-C(11)     | 127.9(4) |
| C(9)-C(10)-H(10A)    | 116.1    |
| C(11)-C(10)-H(10A)   | 116.1    |
| C(12)-C(11)-C(10)    | 126.3(4) |
| C(12)-C(11)-S(1)     | 110.5(3) |
| C(10)-C(11)-S(1)     | 123.2(3) |
| C(11)-C(12)-C(13)    | 112.7(4) |
| C(11)-C(12)-H(12A)   | 123.6    |
| C(13)-C(12)-H(12A)   | 123.6    |
| C(14)-C(13)-C(12)    | 112.6(4) |
| C(14)-C(13)-H(13A)   | 123.7    |
| C(12)-C(13)-H(13A)   | 123.7    |
| C(13)-C(14)-S(1)     | 111.9(3) |
| C(13)-C(14)-H(14A)   | 124.1    |
| S(1)-C(14)-H(14A)    | 124.1    |
| O(6)-C(15)-O(5)      | 122.2(3) |
| O(6)-C(15)-C(16)     | 119.9(3) |
| O(5)-C(15)-C(16)     | 117.9(3) |
| C(21)-C(16)-C(17)    | 121.4(4) |
| C(21)-C(16)-C(15)    | 118.1(4) |
| C(17)-C(16)-C(15)    | 120.5(4) |
| C(18)-C(17)-C(16)    | 117.1(5) |
| C(18)-C(17)-C(170)   | 123.2(4) |
| C(16)-C(17)-C(170)   | 119.7(4) |
| C(17)-C(170)-C(172)  | 112.0(4) |
| C(17)-C(170)-C(171)  | 113.4(4) |
| C(172)-C(170)-C(171) | 110.0(4) |
| C(17)-C(170)-H(17A)  | 107.1    |
| C(172)-C(170)-H(17A) | 107.1    |
| C(171)-C(170)-H(17A) | 107.1    |
| C(170)-C(171)-H(17E) | 109.5    |
| C(170)-C(171)-H(17F) | 109.5    |
| H(17E)-C(171)-H(17F) | 109.5    |
| C(170)-C(171)-H(17G) | 109.5    |
| H(17E)-C(171)-H(17G) | 109.5    |
| H(17F)-C(171)-H(17G) | 109.5    |
| C(170)-C(172)-H(17B) | 109.5    |
| C(170)-C(172)-H(17C) | 109.5    |
| H(17B)-C(172)-H(17C) | 109.5    |
| C(170)-C(172)-H(17D) | 109.5    |
| H(17B)-C(172)-H(17D) | 109.5    |
| H(17C)-C(172)-H(17D) | 109.5    |
| C(19)-C(18)-C(17)    | 123.1(5) |
| C(19)-C(18)-H(18A)   | 118.4    |
| C(17)-C(18)-H(18A)   | 118.4    |
| C(18)-C(19)-C(20)    | 117.8(5) |
| C(18)-C(19)-C(190)   | 120.2(7) |

|                      |          |
|----------------------|----------|
| C(20)-C(19)-C(190)   | 122.0(7) |
| C(192)-C(190)-C(191) | 129.3(7) |
| C(192)-C(190)-C(19)  | 116.4(6) |
| C(191)-C(190)-C(19)  | 114.0(6) |
| C(192)-C(190)-H(19G) | 91.9     |
| C(191)-C(190)-H(19G) | 91.9     |
| C(19)-C(190)-H(19G)  | 91.9     |
| C(190)-C(191)-H(19A) | 109.5    |
| C(190)-C(191)-H(19B) | 109.5    |
| H(19A)-C(191)-H(19B) | 109.5    |
| C(190)-C(191)-H(19C) | 109.5    |
| H(19A)-C(191)-H(19C) | 109.5    |
| H(19B)-C(191)-H(19C) | 109.5    |
| C(190)-C(192)-H(19D) | 109.5    |
| C(190)-C(192)-H(19E) | 109.5    |
| H(19D)-C(192)-H(19E) | 109.5    |
| C(190)-C(192)-H(19F) | 109.5    |
| H(19D)-C(192)-H(19F) | 109.5    |
| H(19E)-C(192)-H(19F) | 109.5    |
| C(19)-C(20)-C(21)    | 122.4(5) |
| C(19)-C(20)-H(20A)   | 118.8    |
| C(21)-C(20)-H(20A)   | 118.8    |
| C(20)-C(21)-C(16)    | 118.1(5) |
| C(20)-C(21)-C(210)   | 121.1(5) |
| C(16)-C(21)-C(210)   | 120.8(4) |
| C(212)-C(210)-C(21)  | 112.6(9) |
| C(212)-C(210)-C(211) | 108.6(9) |
| C(21)-C(210)-C(211)  | 107.1(8) |
| C(212)-C(210)-H(21A) | 109.5    |
| C(21)-C(210)-H(21A)  | 109.5    |
| C(211)-C(210)-H(21A) | 109.5    |
| H(21I)-C(214)-H(21J) | 109.5    |
| H(21I)-C(214)-H(21K) | 109.5    |
| H(21J)-C(214)-H(21K) | 109.5    |
| H(21L)-C(215)-H(21M) | 109.5    |
| H(21L)-C(215)-H(21N) | 109.5    |
| H(21M)-C(215)-H(21N) | 109.5    |
| O(7)-C(23)-O(8)      | 125.4(4) |
| O(7)-C(23)-C(24)     | 120.4(4) |
| O(8)-C(23)-C(24)     | 114.1(5) |
| C(25)-C(24)-C(23)    | 126.5(5) |
| C(25)-C(24)-H(24A)   | 116.7    |
| C(23)-C(24)-H(24A)   | 116.7    |
| C(24)-C(25)-C(26)    | 127.7(6) |
| C(24)-C(25)-H(25A)   | 116.2    |
| C(26)-C(25)-H(25A)   | 116.2    |
| C(29)-S(2)-C(26)     | 93.7(3)  |
| C(25)-C(26)-C(27)    | 112.9(5) |
| C(25)-C(26)-S(2)     | 125.7(4) |
| C(27)-C(26)-S(2)     | 121.4(4) |
| C(26)-C(27)-C(28)    | 94.6(5)  |
| C(26)-C(27)-H(27A)   | 132.7    |
| C(28)-C(27)-H(27A)   | 132.7    |
| C(29)-C(28)-C(27)    | 116.2(5) |
| C(29)-C(28)-H(28A)   | 121.9    |
| C(27)-C(28)-H(28A)   | 121.9    |
| C(28)-C(29)-S(2)     | 114.1(4) |
| C(28)-C(29)-H(29A)   | 123.0    |
| S(2)-C(29)-H(29A)    | 123.0    |
| O(10)-S(10)-C(101)   | 109.6(3) |
| O(10)-S(10)-C(102)   | 100.9(4) |
| C(101)-S(10)-C(102)  | 88.3(5)  |
| S(10)-O(10)-Mo(2)    | 127.0(2) |

|                      |            |
|----------------------|------------|
| S(10)-C(101)-H(10C)  | 109.5      |
| S(10)-C(101)-H(10D)  | 109.5      |
| H(10C)-C(101)-H(10D) | 109.5      |
| S(10)-C(101)-H(10E)  | 109.5      |
| H(10C)-C(101)-H(10E) | 109.5      |
| H(10D)-C(101)-H(10E) | 109.5      |
| S(10)-C(102)-H(10F)  | 109.5      |
| S(10)-C(102)-H(10G)  | 109.5      |
| H(10F)-C(102)-H(10G) | 109.5      |
| S(10)-C(102)-H(10H)  | 109.5      |
| H(10F)-C(102)-H(10H) | 109.5      |
| H(10G)-C(102)-H(10H) | 109.5      |
| O(11)-S(11)-C(111)   | 107(2)     |
| O(11)-S(11)-C(113)   | 103.0(8)   |
| C(111)-S(11)-C(113)  | 97(2)      |
| S(11)-O(11)-Mo(1)    | 127.50(18) |
| C(114)-S(11')-C(112) | 95(2)      |
| S(11')-C(114)-H(11G) | 109.5      |
| S(11')-C(114)-H(11H) | 109.5      |
| H(11G)-C(114)-H(11H) | 109.5      |
| S(11')-C(114)-H(11I) | 109.5      |
| H(11G)-C(114)-H(11I) | 109.5      |
| H(11H)-C(114)-H(11I) | 109.5      |
| S(11')-C(112)-H(11J) | 109.5      |
| S(11')-C(112)-H(11K) | 109.5      |
| H(11J)-C(112)-H(11K) | 109.5      |
| S(11')-C(112)-H(11L) | 109.5      |
| H(11J)-C(112)-H(11L) | 109.5      |
| H(11K)-C(112)-H(11L) | 109.5      |
| C(144)-O(14)-C(141)  | 108(2)     |
| O(14)-C(141)-C(142)  | 109.6(18)  |
| O(14)-C(141)-H(14B)  | 109.7      |
| C(142)-C(141)-H(14B) | 109.7      |
| O(14)-C(141)-H(14C)  | 109.7      |
| C(142)-C(141)-H(14C) | 109.7      |
| H(14B)-C(141)-H(14C) | 108.2      |
| C(141)-C(142)-C(143) | 99.9(16)   |
| C(141)-C(142)-H(14D) | 111.8      |
| C(143)-C(142)-H(14D) | 111.8      |
| C(141)-C(142)-H(14E) | 111.8      |
| C(143)-C(142)-H(14E) | 111.8      |
| H(14D)-C(142)-H(14E) | 109.5      |
| C(144)-C(143)-C(142) | 98.1(18)   |
| C(144)-C(143)-H(14F) | 112.1      |
| C(142)-C(143)-H(14F) | 112.1      |
| C(144)-C(143)-H(14G) | 112.1      |
| C(142)-C(143)-H(14G) | 112.1      |
| H(14F)-C(143)-H(14G) | 109.8      |
| O(14)-C(144)-C(143)  | 106(2)     |
| O(14)-C(144)-H(14H)  | 110.4      |
| C(143)-C(144)-H(14H) | 110.4      |
| O(14)-C(144)-H(14I)  | 110.4      |
| C(143)-C(144)-H(14I) | 110.4      |
| H(14H)-C(144)-H(14I) | 108.6      |
| C(148)-O(14')-C(145) | 106.4(15)  |
| O(14')-C(145)-C(146) | 111.5(12)  |
| O(14')-C(145)-H(14J) | 109.3      |
| C(146)-C(145)-H(14J) | 109.3      |
| O(14')-C(145)-H(14K) | 109.3      |
| C(146)-C(145)-H(14K) | 109.3      |
| H(14J)-C(145)-H(14K) | 108.0      |
| C(145)-C(146)-C(147) | 100.6(11)  |
| C(145)-C(146)-H(14L) | 111.7      |

|                      |           |
|----------------------|-----------|
| C(147)-C(146)-H(14L) | 111.7     |
| C(145)-C(146)-H(14M) | 111.7     |
| C(147)-C(146)-H(14M) | 111.7     |
| H(14L)-C(146)-H(14M) | 109.4     |
| C(148)-C(147)-C(146) | 104.0(12) |
| C(148)-C(147)-H(14N) | 111.0     |
| C(146)-C(147)-H(14N) | 111.0     |
| C(148)-C(147)-H(14O) | 111.0     |
| C(146)-C(147)-H(14O) | 111.0     |
| H(14N)-C(147)-H(14O) | 109.0     |
| O(14')-C(148)-C(147) | 113.1(14) |
| O(14')-C(148)-H(14P) | 109.0     |
| C(147)-C(148)-H(14P) | 109.0     |
| O(14')-C(148)-H(14Q) | 109.0     |
| C(147)-C(148)-H(14Q) | 109.0     |
| H(14P)-C(148)-H(14Q) | 107.8     |
| C(131)-O(13)-C(134)  | 96.3(18)  |
| C(132)-C(131)-O(13)  | 106.5(16) |
| C(132)-C(131)-H(13B) | 110.4     |
| O(13)-C(131)-H(13B)  | 110.4     |
| C(132)-C(131)-H(13C) | 110.4     |
| O(13)-C(131)-H(13C)  | 110.4     |
| H(13B)-C(131)-H(13C) | 108.6     |
| C(133)-C(132)-C(131) | 104.6(18) |
| C(133)-C(132)-H(13D) | 110.8     |
| C(131)-C(132)-H(13D) | 110.8     |
| C(133)-C(132)-H(13E) | 110.8     |
| C(131)-C(132)-H(13E) | 110.8     |
| H(13D)-C(132)-H(13E) | 108.9     |
| C(132)-C(133)-C(134) | 104(2)    |
| C(132)-C(133)-H(13F) | 110.9     |
| C(134)-C(133)-H(13F) | 110.9     |
| C(132)-C(133)-H(13G) | 110.9     |
| C(134)-C(133)-H(13G) | 110.9     |
| H(13F)-C(133)-H(13G) | 108.9     |
| C(133)-C(134)-O(13)  | 94.2(17)  |
| C(133)-C(134)-H(13H) | 112.9     |
| O(13)-C(134)-H(13H)  | 112.9     |
| C(133)-C(134)-H(13I) | 112.9     |
| O(13)-C(134)-H(13I)  | 112.9     |
| H(13H)-C(134)-H(13I) | 110.3     |
| C(135)-O(13')-C(138) | 105.9(10) |
| C(136)-C(135)-O(13') | 102.6(10) |
| C(136)-C(135)-H(13J) | 111.2     |
| O(13')-C(135)-H(13J) | 111.2     |
| C(136)-C(135)-H(13K) | 111.2     |
| O(13')-C(135)-H(13K) | 111.2     |
| H(13J)-C(135)-H(13K) | 109.2     |
| C(137)-C(136)-C(135) | 113.0(10) |
| C(137)-C(136)-H(13L) | 109.0     |
| C(135)-C(136)-H(13L) | 109.0     |
| C(137)-C(136)-H(13M) | 109.0     |
| C(135)-C(136)-H(13M) | 109.0     |
| H(13L)-C(136)-H(13M) | 107.8     |
| C(136)-C(137)-C(138) | 112.8(12) |
| C(136)-C(137)-H(13N) | 109.0     |
| C(138)-C(137)-H(13N) | 109.0     |
| C(136)-C(137)-H(13O) | 109.0     |
| C(138)-C(137)-H(13O) | 109.0     |
| H(13N)-C(137)-H(13O) | 107.8     |
| C(137)-C(138)-O(13') | 99.0(10)  |
| C(137)-C(138)-H(13P) | 112.0     |
| O(13')-C(138)-H(13P) | 112.0     |

|                      |       |
|----------------------|-------|
| C(137)-C(138)-H(13Q) | 112.0 |
| O(13')-C(138)-H(13Q) | 112.0 |
| H(13P)-C(138)-H(13Q) | 109.6 |

Symmetry transformations used to generate equivalent atoms:  
 #1 -x+1,-y+2,-z #2 -x,-y+1,-z+1

Table 4. Anisotropic displacement parameters ( $\text{Å}^2 \times 10^3$ ) for carly2.  
 The anisotropic displacement factor exponent takes the form:  
 $-2 \pi^2 [ h^2 a^{*2} U_{11} + \dots + 2 h k a^* b^* U_{12} ]$

|        | U11     | U22     | U33    | U23    | U13    | U12      |
|--------|---------|---------|--------|--------|--------|----------|
| Mo(1)  | 30(1)   | 27(1)   | 22(1)  | -3(1)  | -5(1)  | -7(1)    |
| Mo(2)  | 42(1)   | 30(1)   | 23(1)  | -7(1)  | -9(1)  | -2(1)    |
| S(1)   | 43(1)   | 65(1)   | 38(1)  | -23(1) | -3(1)  | -8(1)    |
| O(1)   | 39(1)   | 33(1)   | 27(1)  | -3(1)  | -5(1)  | -13(1)   |
| O(2)   | 37(1)   | 35(1)   | 27(1)  | -5(1)  | -4(1)  | -13(1)   |
| O(3)   | 31(1)   | 35(1)   | 27(1)  | -6(1)  | -5(1)  | -7(1)    |
| O(4)   | 32(1)   | 32(1)   | 29(1)  | -6(1)  | -4(1)  | -4(1)    |
| O(5)   | 48(2)   | 33(1)   | 28(1)  | -10(1) | -9(1)  | 1(1)     |
| O(6)   | 43(2)   | 34(1)   | 27(1)  | -10(1) | -7(1)  | -3(1)    |
| O(7)   | 45(2)   | 57(2)   | 64(2)  | -25(2) | -6(2)  | -14(2)   |
| O(8)   | 77(2)   | 33(2)   | 52(2)  | -12(1) | 36(2)  | -16(2)   |
| C(1)   | 36(2)   | 34(2)   | 29(2)  | -10(2) | 1(2)   | -11(2)   |
| C(2)   | 48(2)   | 41(2)   | 28(2)  | -6(2)  | -1(2)  | -21(2)   |
| C(3)   | 61(3)   | 44(3)   | 47(3)  | -15(2) | 10(2)  | -25(2)   |
| C(30)  | 77(4)   | 53(3)   | 89(4)  | -35(3) | 29(3)  | -31(3)   |
| C(31)  | 63(4)   | 149(7)  | 111(6) | -77(5) | 8(4)   | -17(4)   |
| C(32)  | 112(5)  | 97(5)   | 70(4)  | -35(4) | 30(4)  | -16(4)   |
| C(4)   | 72(3)   | 41(3)   | 72(3)  | -18(2) | 3(3)   | -25(2)   |
| C(5)   | 55(3)   | 56(3)   | 73(3)  | -14(3) | 8(3)   | -29(2)   |
| C(50)  | 83(4)   | 63(4)   | 109(5) | -28(4) | 20(4)  | -40(3)   |
| C(51)  | 320(15) | 206(10) | 65(5)  | -23(5) | 20(6)  | -227(11) |
| C(52)  | 102(5)  | 81(4)   | 108(5) | -29(4) | -12(4) | -54(4)   |
| C(6)   | 46(3)   | 64(3)   | 77(4)  | -23(3) | 10(2)  | -26(2)   |
| C(7)   | 43(2)   | 53(3)   | 46(3)  | -8(2)  | -2(2)  | -21(2)   |
| C(70)  | 44(3)   | 63(3)   | 92(4)  | -26(3) | 12(3)  | -12(2)   |
| C(71)  | 66(4)   | 67(4)   | 133(6) | -19(4) | -2(4)  | -3(3)    |
| C(72)  | 102(5)  | 106(6)  | 125(6) | -59(5) | 44(5)  | -23(5)   |
| C(8)   | 33(2)   | 34(2)   | 33(2)  | -9(2)  | -1(2)  | -11(2)   |
| C(9)   | 39(2)   | 41(2)   | 30(2)  | -11(2) | -2(2)  | -10(2)   |
| C(10)  | 38(2)   | 41(2)   | 31(2)  | -12(2) | 0(2)   | -12(2)   |
| C(11)  | 36(2)   | 41(2)   | 34(2)  | -15(2) | 1(2)   | -11(2)   |
| C(12)  | 44(2)   | 47(2)   | 41(2)  | -17(2) | -5(2)  | -1(2)    |
| C(13)  | 45(3)   | 53(3)   | 59(3)  | -30(2) | -5(2)  | 2(2)     |
| C(14)  | 43(2)   | 63(3)   | 58(3)  | -39(2) | 7(2)   | -11(2)   |
| C(15)  | 32(2)   | 33(2)   | 28(2)  | -8(2)  | -2(2)  | -10(2)   |
| C(16)  | 41(2)   | 33(2)   | 30(2)  | -11(2) | -8(2)  | -3(2)    |
| C(17)  | 42(2)   | 48(2)   | 37(2)  | -20(2) | -10(2) | -2(2)    |
| C(170) | 40(2)   | 69(3)   | 56(3)  | -29(3) | 4(2)   | -13(2)   |
| C(171) | 60(3)   | 131(6)  | 75(4)  | -55(4) | 22(3)  | -36(4)   |
| C(172) | 55(3)   | 96(4)   | 78(4)  | -48(3) | 3(3)   | -26(3)   |
| C(18)  | 57(3)   | 64(3)   | 57(3)  | -35(3) | -14(2) | 16(3)    |
| C(19)  | 112(5)  | 39(3)   | 70(4)  | -27(3) | -30(4) | 11(3)    |
| C(190) | 195(9)  | 58(4)   | 125(7) | -59(4) | -56(6) | 34(5)    |
| C(191) | 169(8)  | 68(4)   | 106(6) | -57(4) | 7(5)   | -12(5)   |
| C(192) | 185(9)  | 69(5)   | 154(8) | -50(5) | -63(7) | 67(6)    |

|        |         |         |         |          |         |          |
|--------|---------|---------|---------|----------|---------|----------|
| C(20)  | 115(5)  | 36(3)   | 66(4)   | -15(2)   | -17(3)  | -21(3)   |
| C(21)  | 70(3)   | 40(2)   | 46(3)   | -14(2)   | -6(2)   | -20(2)   |
| C(210) | 82(4)   | 67(4)   | 89(4)   | -27(3)   | 19(3)   | -47(3)   |
| C(211) | 62(9)   | 152(19) | 98(11)  | -7(11)   | 4(7)    | -48(10)  |
| C(212) | 138(14) | 160(20) | 65(9)   | -11(10)  | 16(8)   | -86(13)  |
| C(213) | 82(4)   | 67(4)   | 89(4)   | -27(3)   | 19(3)   | -47(3)   |
| C(214) | 105(17) | 200(40) | 330(60) | -170(40) | 80(30)  | -110(20) |
| C(215) | 136(18) | 78(13)  | 125(17) | -24(11)  | 59(14)  | -37(11)  |
| C(23)  | 41(2)   | 43(2)   | 60(3)   | -24(2)   | -19(2)  | -5(2)    |
| C(24)  | 67(3)   | 60(3)   | 58(3)   | -15(3)   | -14(3)  | -13(3)   |
| C(25)  | 74(3)   | 46(3)   | 68(3)   | -24(3)   | 20(3)   | -20(3)   |
| S(2)   | 53(2)   | 82(2)   | 42(1)   | -1(1)    | -6(1)   | -39(2)   |
| C(26)  | 45(2)   | 50(3)   | 54(3)   | -21(2)   | 7(2)    | -19(2)   |
| C(27)  | 17(4)   | 44(3)   | 37(4)   | -16(3)   | -2(3)   | -13(3)   |
| C(28)  | 63(3)   | 57(3)   | 43(3)   | 0(2)     | 6(2)    | -30(2)   |
| C(29)  | 60(3)   | 87(4)   | 49(3)   | -15(3)   | 5(2)    | -45(3)   |
| S(2')  | 53(2)   | 82(2)   | 42(1)   | -1(1)    | -6(1)   | -39(2)   |
| C(26') | 45(2)   | 50(3)   | 54(3)   | -21(2)   | 7(2)    | -19(2)   |
| C(27') | 17(4)   | 44(3)   | 37(4)   | -16(3)   | -2(3)   | -13(3)   |
| C(28') | 63(3)   | 57(3)   | 43(3)   | 0(2)     | 6(2)    | -30(2)   |
| C(29') | 60(3)   | 87(4)   | 49(3)   | -15(3)   | 5(2)    | -45(3)   |
| S(10)  | 97(1)   | 88(1)   | 59(1)   | -21(1)   | -19(1)  | 19(1)    |
| O(10)  | 107(3)  | 97(3)   | 49(2)   | -21(2)   | -37(2)  | 40(3)    |
| C(101) | 145(7)  | 89(5)   | 76(5)   | -31(4)   | -41(5)  | 26(5)    |
| C(102) | 76(5)   | 120(7)  | 201(10) | -9(7)    | 39(6)   | -36(5)   |
| S(11)  | 48(1)   | 64(1)   | 42(1)   | -23(1)   | 0(1)    | -17(1)   |
| O(11)  | 57(2)   | 43(2)   | 32(2)   | -9(1)    | -11(1)  | -9(1)    |
| C(111) | 73(6)   | 55(6)   | 65(6)   | -29(5)   | -20(5)  | -5(4)    |
| C(113) | 94(16)  | 61(9)   | 48(10)  | -16(7)   | -32(10) | -5(9)    |
| S(11') | 48(1)   | 64(1)   | 42(1)   | -23(1)   | 0(1)    | -17(1)   |
| O(11') | 57(2)   | 43(2)   | 32(2)   | -9(1)    | -11(1)  | -9(1)    |
| C(114) | 73(6)   | 55(6)   | 65(6)   | -29(5)   | -20(5)  | -5(4)    |
| C(112) | 94(16)  | 61(9)   | 48(10)  | -16(7)   | -32(10) | -5(9)    |
| O(14)  | 175(8)  | 286(10) | 151(8)  | -44(7)   | 4(6)    | -125(8)  |
| C(141) | 175(8)  | 293(12) | 118(10) | -55(9)   | 23(7)   | -150(9)  |
| C(142) | 189(10) | 265(12) | 149(9)  | -40(8)   | -3(7)   | -133(9)  |
| C(143) | 184(9)  | 262(11) | 187(12) | -3(9)    | -17(8)  | -133(9)  |
| C(144) | 157(8)  | 291(13) | 158(12) | -18(9)   | -2(8)   | -124(8)  |
| O(14') | 175(8)  | 286(10) | 151(8)  | -44(7)   | 4(6)    | -125(8)  |
| C(145) | 175(8)  | 293(12) | 118(10) | -55(9)   | 23(7)   | -150(9)  |
| C(146) | 189(10) | 265(12) | 149(9)  | -40(8)   | -3(7)   | -133(9)  |
| C(147) | 184(9)  | 262(11) | 187(12) | -3(9)    | -17(8)  | -133(9)  |
| C(148) | 157(8)  | 291(13) | 158(12) | -18(9)   | -2(8)   | -124(8)  |
| O(13)  | 237(9)  | 266(10) | 118(7)  | 29(7)    | -27(7)  | -135(8)  |
| C(131) | 213(9)  | 253(11) | 88(6)   | -8(7)    | -45(7)  | -132(8)  |
| C(132) | 202(8)  | 212(12) | 99(6)   | 8(7)     | -44(7)  | -155(8)  |
| C(133) | 221(9)  | 173(9)  | 93(6)   | -17(6)   | -22(7)  | -120(7)  |
| C(134) | 182(8)  | 196(9)  | 122(10) | -59(9)   | -4(7)   | -112(7)  |
| O(13') | 237(9)  | 266(10) | 118(7)  | 29(7)    | -27(7)  | -135(8)  |
| C(135) | 213(9)  | 253(11) | 88(6)   | -8(7)    | -45(7)  | -132(8)  |
| C(136) | 202(8)  | 212(12) | 99(6)   | 8(7)     | -44(7)  | -155(8)  |
| C(137) | 221(9)  | 173(9)  | 93(6)   | -17(6)   | -22(7)  | -120(7)  |
| C(138) | 182(8)  | 196(9)  | 122(10) | -59(9)   | -4(7)   | -112(7)  |

Table 5. Hydrogen coordinates ( $\times 10^4$ ) and isotropic displacement parameters ( $\text{Å}^2 \times 10^3$ ) for carly2.

|  | x | y | z | U(eq) |
|--|---|---|---|-------|
|--|---|---|---|-------|

|        |       |       |       |     |
|--------|-------|-------|-------|-----|
| H(30A) | 5098  | 7567  | -309  | 83  |
| H(31A) | 6424  | 6220  | 292   | 155 |
| H(31B) | 5653  | 5644  | 720   | 155 |
| H(31C) | 5676  | 6494  | 1058  | 155 |
| H(32A) | 4455  | 7084  | -1309 | 146 |
| H(32B) | 4875  | 6008  | -727  | 146 |
| H(32C) | 5657  | 6564  | -1178 | 146 |
| H(4A)  | 3661  | 5926  | 393   | 72  |
| H(50A) | 1048  | 6366  | 1026  | 98  |
| H(51A) | 1690  | 4914  | 2164  | 247 |
| H(51B) | 1721  | 5822  | 2402  | 247 |
| H(51C) | 2744  | 5126  | 2113  | 247 |
| H(52A) | 1587  | 4994  | 647   | 134 |
| H(52B) | 2756  | 4937  | 638   | 134 |
| H(52C) | 1992  | 5744  | -83   | 134 |
| H(6A)  | 1302  | 7705  | 1302  | 73  |
| H(70A) | 2562  | 9365  | 1190  | 81  |
| H(71A) | 1851  | 9981  | -207  | 143 |
| H(71B) | 1182  | 10564 | 428   | 143 |
| H(71C) | 804   | 9814  | 188   | 143 |
| H(72A) | 1197  | 9694  | 2058  | 167 |
| H(72B) | 1699  | 8566  | 2352  | 167 |
| H(72C) | 692   | 9051  | 1774  | 167 |
| H(9A)  | 2773  | 11577 | 1859  | 44  |
| H(10A) | 1837  | 12445 | 264   | 44  |
| H(12A) | 143   | 13849 | 197   | 55  |
| H(13A) | -960  | 14795 | 1123  | 64  |
| H(14A) | -323  | 14275 | 2571  | 63  |
| H(17A) | 2435  | 3544  | 3558  | 65  |
| H(17E) | 3985  | 3356  | 2835  | 125 |
| H(17F) | 3484  | 2657  | 2643  | 125 |
| H(17G) | 4386  | 2249  | 3329  | 125 |
| H(17B) | 3732  | 3643  | 4288  | 106 |
| H(17C) | 4034  | 2539  | 4791  | 106 |
| H(17D) | 2953  | 3249  | 4971  | 106 |
| H(18A) | 3652  | 1108  | 3830  | 76  |
| H(19G) | 2539  | -667  | 4561  | 161 |
| H(19A) | 3407  | -204  | 3069  | 172 |
| H(19B) | 2302  | -298  | 3348  | 172 |
| H(19C) | 3290  | -1223 | 3535  | 172 |
| H(19D) | 3976  | -1689 | 4907  | 233 |
| H(19E) | 3337  | -1072 | 5526  | 233 |
| H(19F) | 4314  | -850  | 5014  | 233 |
| H(20A) | 1281  | 298   | 4962  | 86  |
| H(21A) | -134  | 2487  | 5420  | 88  |
| H(21B) | -529  | 1483  | 4356  | 162 |
| H(21C) | -671  | 2590  | 4059  | 162 |
| H(21D) | -1406 | 2185  | 4783  | 162 |
| H(21E) | 392   | 983   | 6466  | 175 |
| H(21F) | 41    | 529   | 5842  | 175 |
| H(21G) | -790  | 1286  | 6246  | 175 |
| H(21H) | -278  | 2597  | 5017  | 88  |
| H(21I) | -1397 | 1846  | 5151  | 269 |
| H(21J) | -533  | 834   | 5306  | 269 |
| H(21K) | -657  | 1594  | 4374  | 269 |
| H(21L) | -652  | 1923  | 6464  | 177 |
| H(21M) | 466   | 2013  | 6394  | 177 |
| H(21N) | 330   | 1007  | 6520  | 177 |
| H(24A) | 3120  | 5561  | 5040  | 76  |
| H(25A) | 2491  | 6392  | 3382  | 74  |
| H(27A) | 3483  | 7233  | 2252  | 37  |
| H(28A) | 5368  | 7528  | 2373  | 67  |

|        |       |       |      |     |
|--------|-------|-------|------|-----|
| H(29A) | 6081  | 6854  | 3760 | 73  |
| H(27C) | 4480  | 6263  | 4962 | 37  |
| H(28C) | 5360  | 7521  | 2361 | 67  |
| H(29C) | 6117  | 6758  | 3776 | 73  |
| H(10C) | 2690  | 3641  | 8052 | 173 |
| H(10D) | 2725  | 2599  | 8622 | 173 |
| H(10E) | 1754  | 3490  | 8677 | 173 |
| H(10F) | 648   | 2224  | 8015 | 215 |
| H(10G) | 861   | 2630  | 8743 | 215 |
| H(10H) | 1699  | 1730  | 8534 | 215 |
| H(11A) | 5741  | 10986 | 1884 | 97  |
| H(11B) | 6121  | 10841 | 2826 | 97  |
| H(11C) | 5246  | 10433 | 2722 | 97  |
| H(11D) | 7331  | 8200  | 3685 | 105 |
| H(11E) | 6147  | 8780  | 3743 | 105 |
| H(11F) | 6996  | 9187  | 3907 | 105 |
| H(11G) | 5190  | 10825 | 2198 | 97  |
| H(11H) | 6393  | 10637 | 2190 | 97  |
| H(11I) | 5743  | 10717 | 3053 | 97  |
| H(11J) | 7534  | 8287  | 3596 | 105 |
| H(11K) | 7084  | 9224  | 3904 | 105 |
| H(11L) | 7686  | 9256  | 3004 | 105 |
| H(14B) | -2197 | 4005  | 3071 | 214 |
| H(14C) | -2633 | 4784  | 2179 | 214 |
| H(14D) | -2310 | 2988  | 2419 | 228 |
| H(14E) | -3156 | 3794  | 1744 | 228 |
| H(14F) | -4195 | 3062  | 2710 | 250 |
| H(14G) | -3507 | 2871  | 3529 | 250 |
| H(14H) | -4769 | 4678  | 2502 | 239 |
| H(14I) | -4801 | 4273  | 3537 | 239 |
| H(14J) | -1867 | 3713  | 3125 | 214 |
| H(14K) | -2663 | 4532  | 3481 | 214 |
| H(14L) | -2705 | 4189  | 1896 | 228 |
| H(14M) | -3170 | 5183  | 2127 | 228 |
| H(14N) | -4667 | 4927  | 2561 | 250 |
| H(14O) | -4299 | 4097  | 2095 | 250 |
| H(14P) | -4500 | 3867  | 3789 | 239 |
| H(14Q) | -4064 | 3044  | 3327 | 239 |
| H(13B) | 7278  | 12799 | 1443 | 211 |
| H(13C) | 7251  | 11991 | 1039 | 211 |
| H(13D) | 7570  | 11840 | 2696 | 187 |
| H(13E) | 7283  | 11117 | 2322 | 187 |
| H(13F) | 8813  | 10533 | 1946 | 181 |
| H(13G) | 8876  | 10614 | 2901 | 181 |
| H(13H) | 9981  | 11330 | 1913 | 180 |
| H(13I) | 9098  | 12117 | 2275 | 180 |
| H(13J) | 7627  | 11522 | 1163 | 211 |
| H(13K) | 8630  | 10597 | 1326 | 211 |
| H(13L) | 7291  | 11169 | 2485 | 187 |
| H(13M) | 8279  | 10246 | 2645 | 187 |
| H(13N) | 8723  | 10818 | 3349 | 181 |
| H(13O) | 7919  | 11839 | 2940 | 181 |
| H(13P) | 9919  | 11110 | 2453 | 180 |
| H(13Q) | 9263  | 12193 | 2415 | 180 |

---
